# Supplementary material
Source: PubMed Central journal article supplement (PMC8666082)
Supplement: 13072_2021_428_MOESM2_ESM.pdf [file 13072_2021_428_MOESM2_ESM.pdf]

**Fig. S1.**

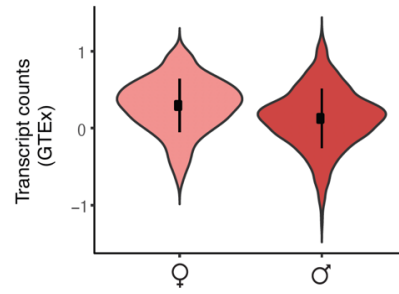

Violin plots of sex-biased gene expression in NLRP2. Expression in blood was quantified as transcript counts (GTEx).

**Fig. S2.**

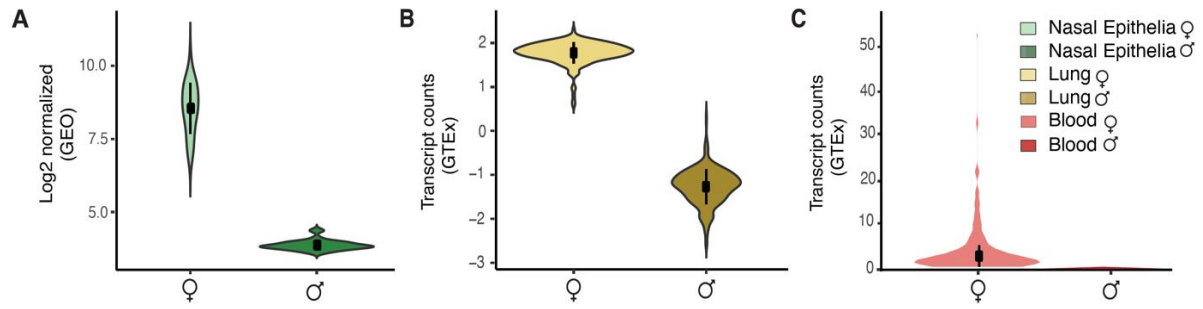

Violin plots of sex-biased gene expression in XIST. **(A)** Expression in nasal epithelia was measured as log2 normalized values (GEO). **(B)** Expression in lung was quantified as transcript counts (GTEx). **(C)** Expression in blood was quantified as transcript counts (GTEx).

**Fig. S3.**

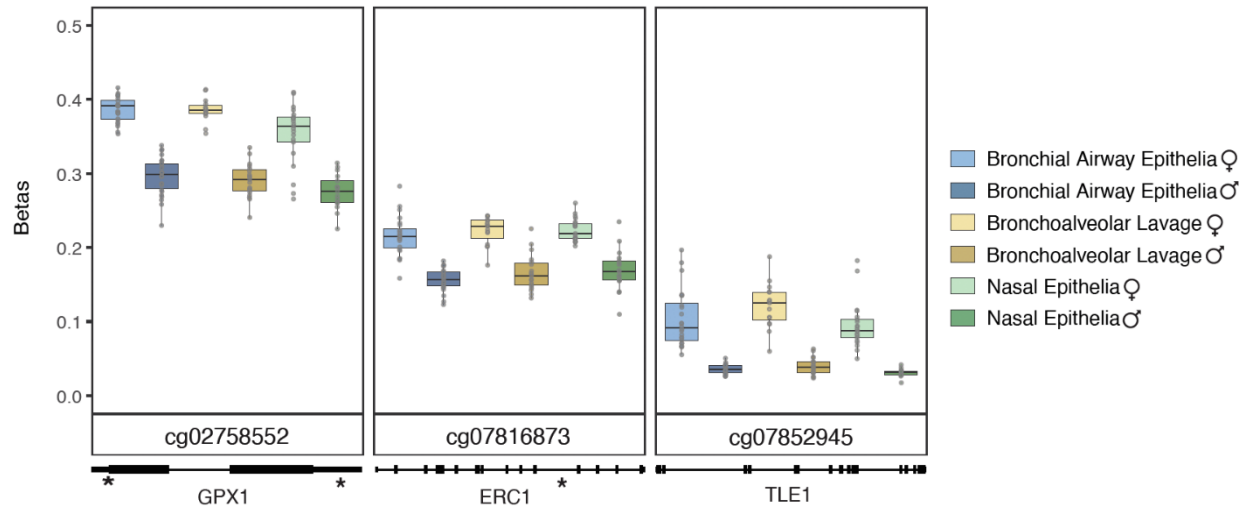

Box plots of the three validated CpG sites (GPX1, ERC1 and TLE1) differentially methylated by sex in three tissues from the repeated exposure dataset. Unadjusted DNA methylation values ( $\beta$ ) were plotted on the y-axis with CpG sites on the x-axis. Genomic positions of the CpG sites are indicated below the respective plots.

**Fig. S4.**

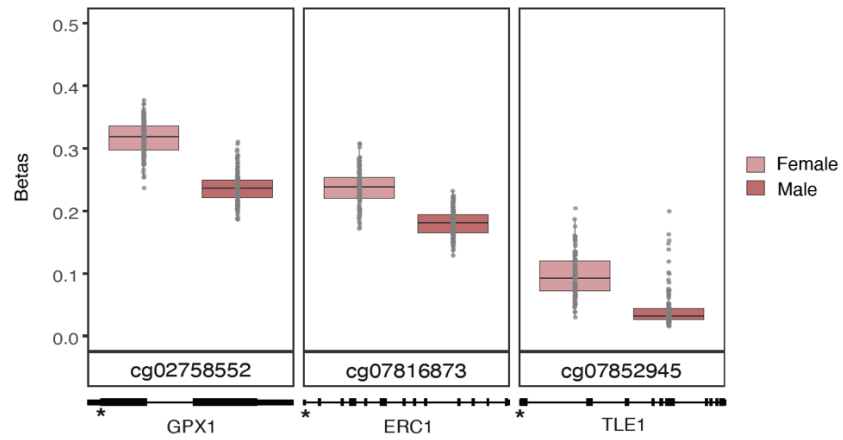

Box plots of the three validated CpG sites (GPX1, ERC1 and TLE1) differentially methylated by sex in blood. Unadjusted DNA methylation values ( $\beta$ ) were plotted on the y-axis against the CpG sites on the x-axis, with genomic locations of the CpG sites plotted below the respective plots.

**Fig. S5.**

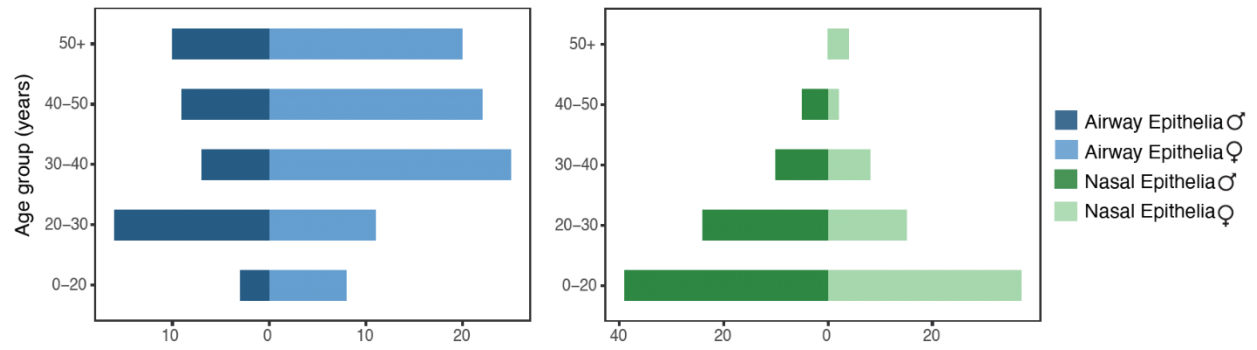

Bar plots of age distributions in airway epithelia and nasal epithelia. Age group in years is indicated on the y-axis while the x-axis represents the number of males and females.

**Fig. S6.**

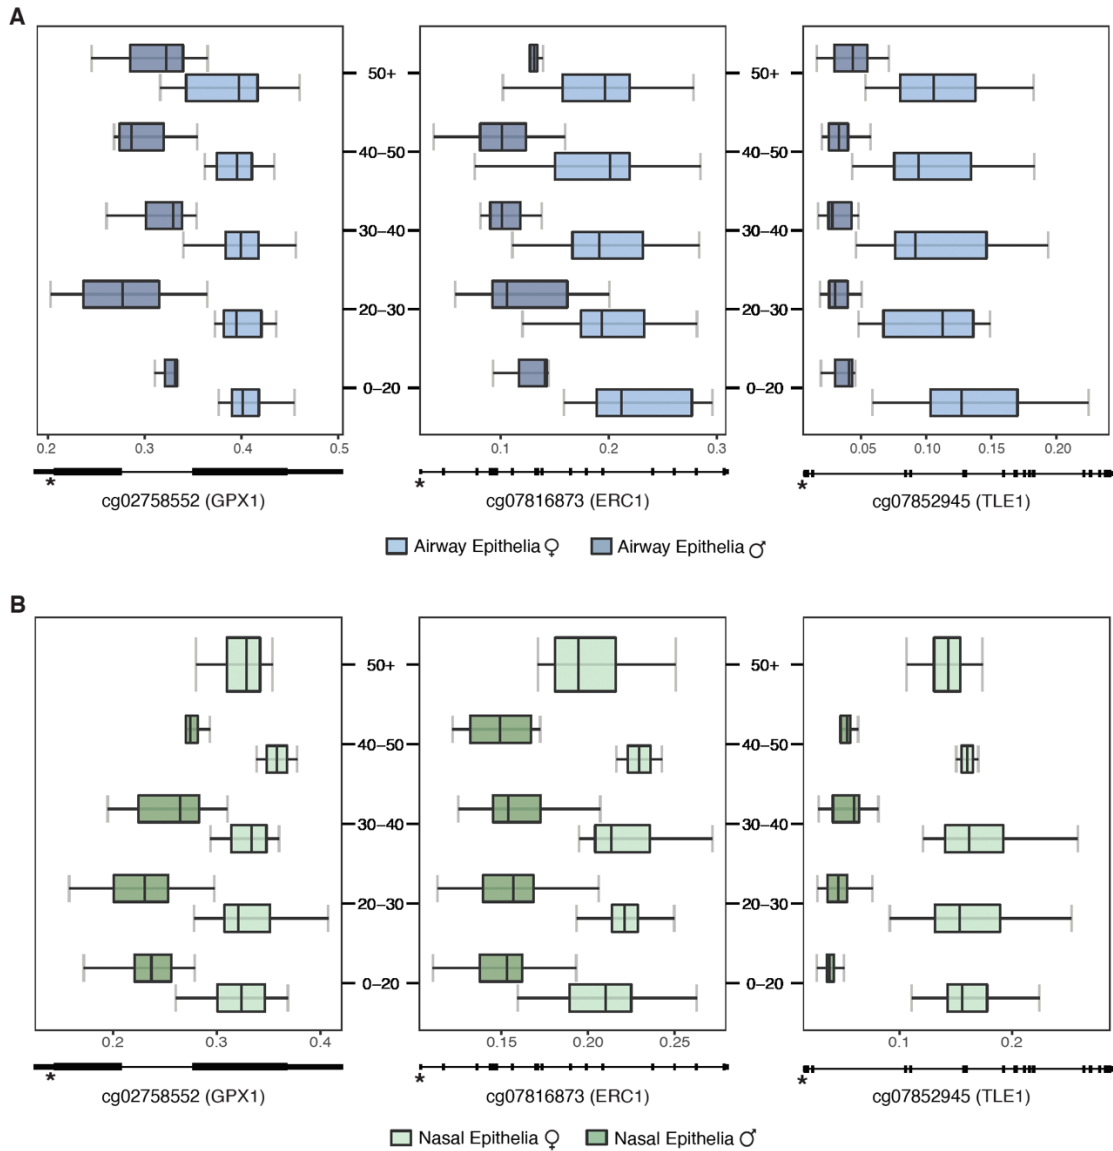

Box plots of the three validated CpG sites (GPX1, ERC1 and TLE1) differentially methylated by sex across the age groups in airway epithelia and nasal epithelia. Unadjusted DNA methylation values ( $\beta$ ) were plotted on the x-axis with age groups in years on the y-axis. Genomic positions of the CpG sites are represented below the respective plots.

**Fig. S7.**

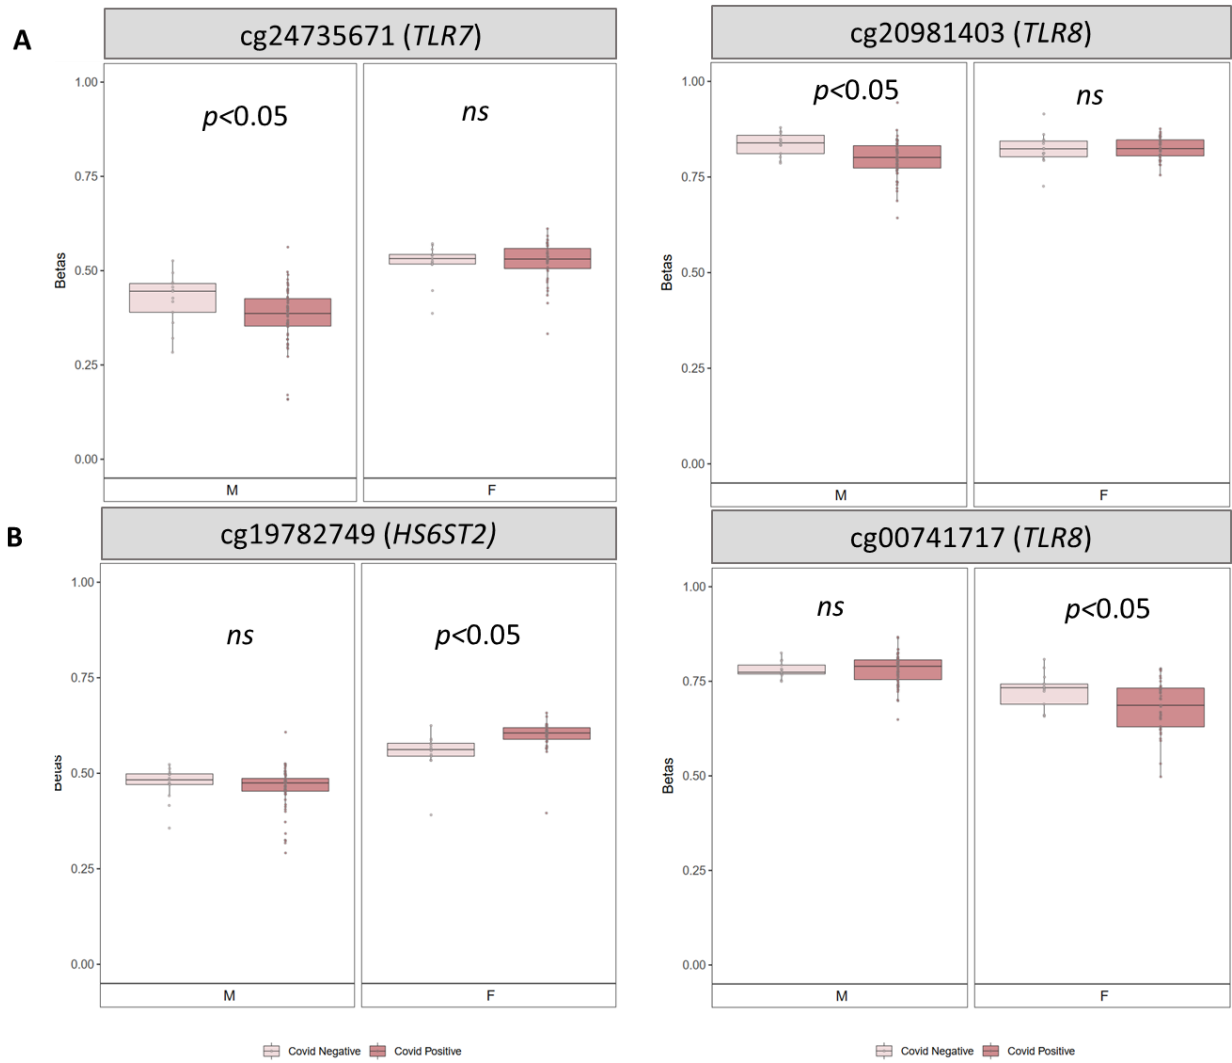

Box plots of the CpG sites that are differentially methylated by COVID-19 status in males (A) and in females (B). Unadjusted DNA methylation values ( $\beta$ ) were plotted on the y-axis and the box plots are colored by COVID-19 status.
